# Supplementary material for: Peptaibol Analogs Show Potent Antibacterial Activity against Multidrug Resistant Opportunistic Pathogens
Source: MDPI journal article supplement (doi:10.3390/ijms24097997), 2023-04-28
Supplement: s1 [file s1]

## SUPPORTING MATERIAL

# Peptaibol Analogs Show Potent Antibacterial Activity against Multidrug Resistant Opportunistic Pathogens

Chiara Dalla Torre <sup>1</sup>, Filomena Sannio <sup>2</sup>, Mattia Battistella <sup>1</sup>, Jean-Denis Docquier <sup>2,3,4</sup>  
and Marta De Zotti <sup>1,\*</sup>

<sup>1</sup> Department of Chemical Sciences, University of Padova, Via Marzolo 1, I-35131 Padova, Italy;  
chiara.dallatorre.2@studenti.unipd.it (C.D.T.); mattia.battistella.1@studenti.unipd.it (M.B.)

<sup>2</sup> Dipartimento di Biotecnologie Mediche, University of Siena, Viale Bracci 16, I-53100 Siena, Italy; filomena.sannio@unisi.it (F.S.);  
jddocquier@unisi.it (J.-D.D.)

<sup>3</sup> Lead Discovery Siena s.r.l., Via Fiorentina 1, I-53100 Siena, Italy

<sup>4</sup> Laboratoire de Bactériologie Moléculaire, Centre d'Ingénierie des Protéines—UR InBioS,  
University of Liège, Allée du six Août 11, B-4000 Liège, Belgium

\* Correspondence: marta.dezotti@unipd.it; Tel.: +39-049-827-5280

## TABLE OF CONTENTS:

1. Figures S1–S12: HPLC and ESI-HRMS spectra for the new sequences 13–18
2. Tables S1–S2: minimum bactericidal concentrations (MBCs),  
Figure S13: hemolysis zones

## 1. HPLC and ESI-HRMS spectra for the new sequences 13–18

Sequences of the new peptides synthesized in this work.<sup>a</sup>

|    |       |                                           |
|----|-------|-------------------------------------------|
| 13 | UKKLL | 1-Oct-Aib-Lys-Lys-Leu-Leu-NH <sub>2</sub> |
| 14 | LUKI  | 1-Oct-Leu-Aib-Lys-Ile-NH <sub>2</sub>     |
| 15 | UKLL  | 1-Oct-Aib-Lys-Leu-Leu-NH <sub>2</sub>     |
| 16 | LUKL  | 1-Oct-Leu-Aib-Lys-Leu-NH <sub>2</sub>     |
| 17 | KLUL  | 1-Oct-Lys-Leu-Aib-Leu-NH <sub>2</sub>     |
| 18 | LKUL  | 1-Oct-Leu-Lys-Aib-Leu-NH <sub>2</sub>     |

<sup>a</sup>U, Aib:  $\alpha$ -aminoisobutyric acid; 1-Oct: 1-octanoyl.

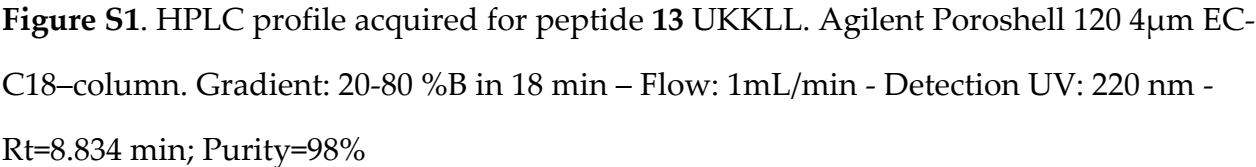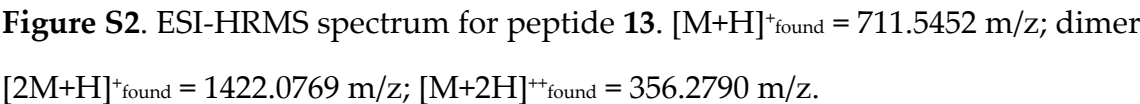

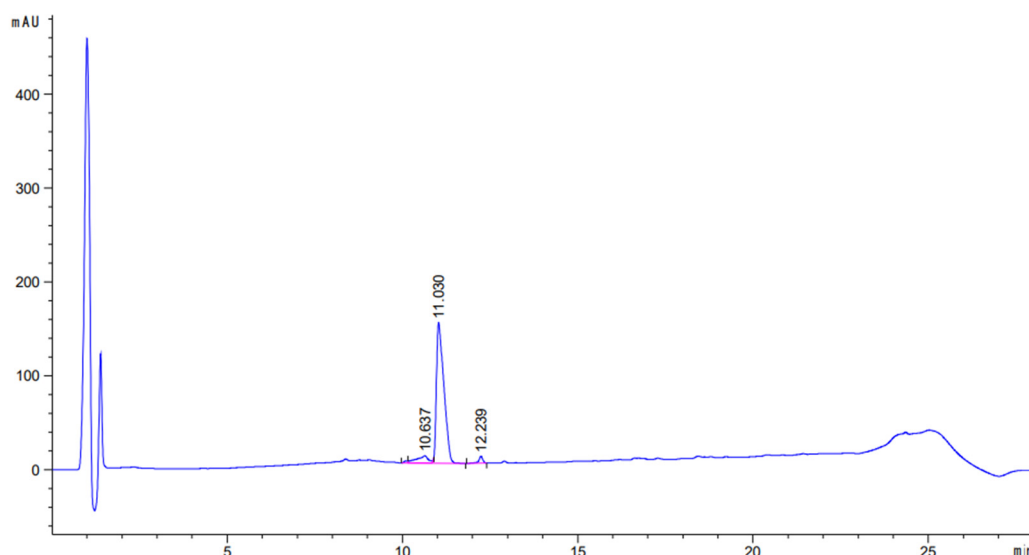

**Figure S3.** HPLC profile acquired for peptide **14** LUKI. Agilent Poroshell 120 4 $\mu$ m EC-C<sub>18</sub>–column; Gradient: 20-80%B in 18 min, flow: 1 mL/min - Detection UV: 220 nm, Rt =11.030 min. Purity 91%

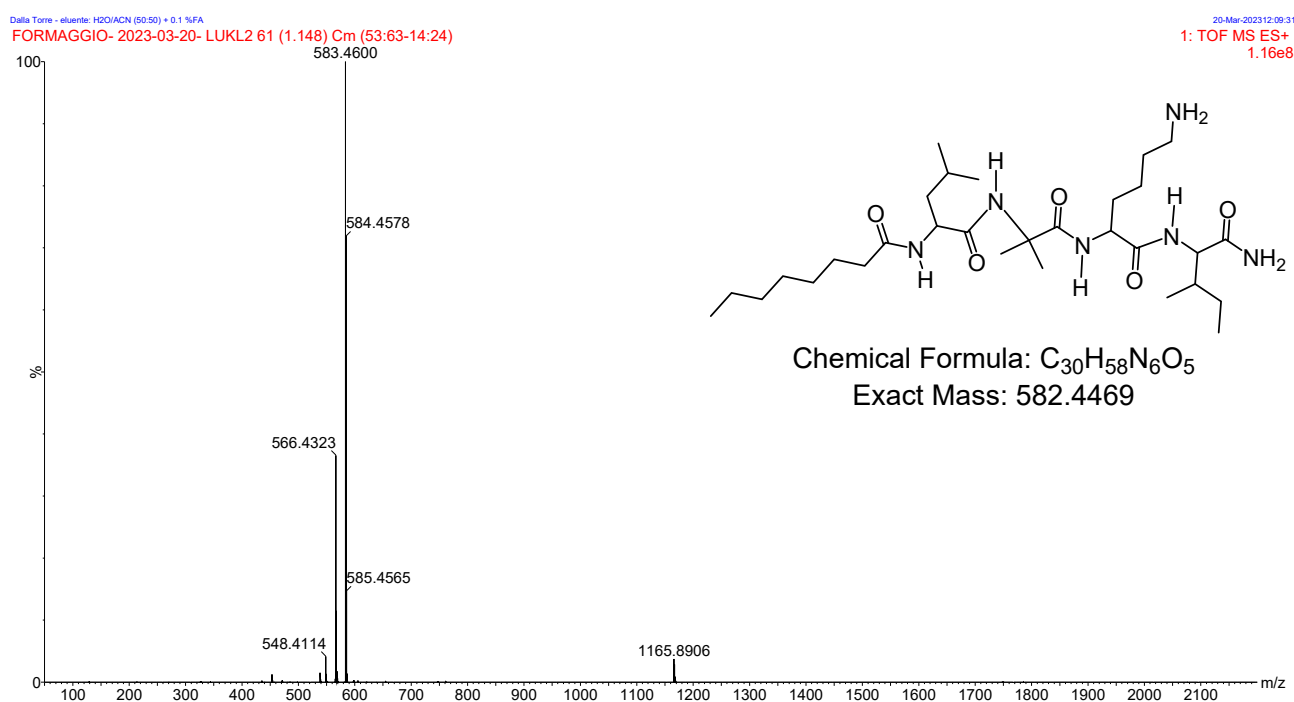

**Figure S4.** ESI-HRMS spectrum for peptide **14**.  $[M+H]^+$ <sub>found</sub> = 583.4600 m/z; fragment  $[M-NH_2]^+$ <sub>found</sub> = 566.4323 m/z; dimer  $[2M+H]^+$ <sub>found</sub> = 1165.8906 m/z.

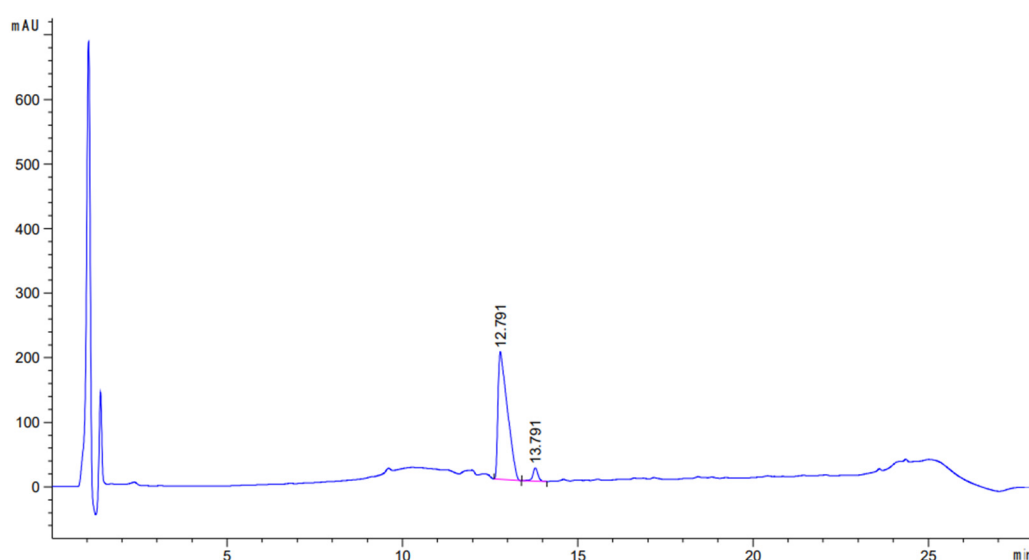

**Figure S5.** HPLC profile acquired for peptide **15** UKLL. Agilent Poroshell 120 4 $\mu$ m EC-C18-column. Gradient: 20-80 %B in 18 min – Flow: 1mL/min - Detection UV: 220 nm - Rt=12.791 min; Purity=95%

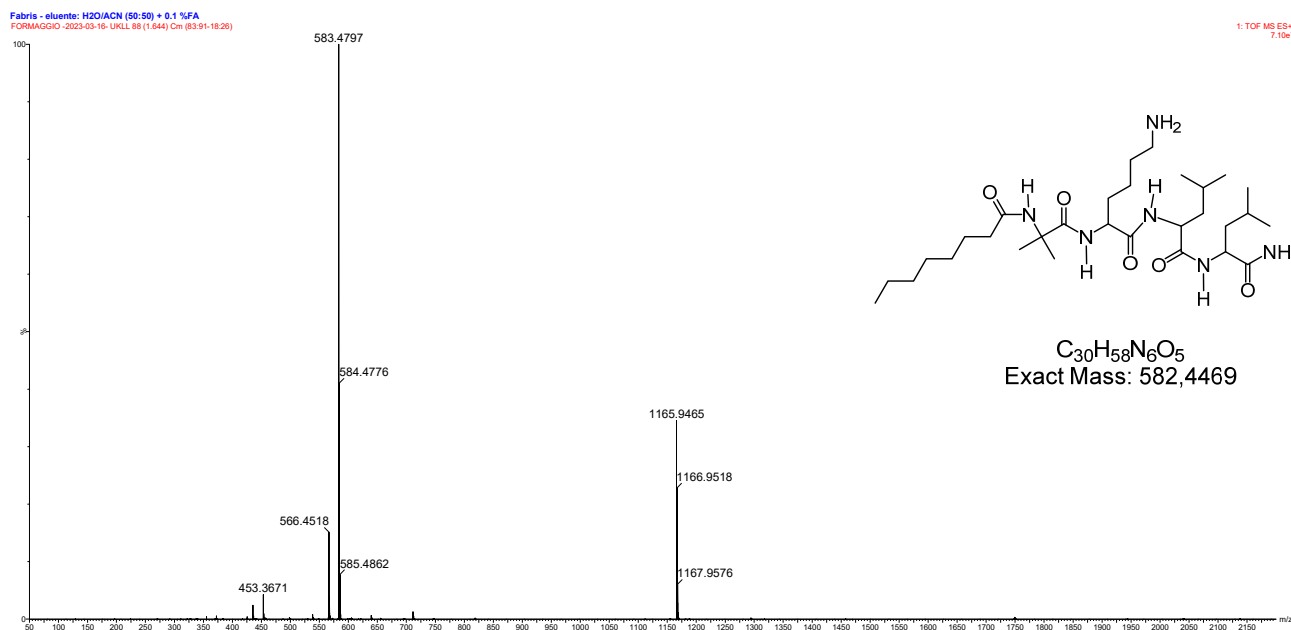

**Figure S6.** ESI-HRMS spectrum for peptide **15** UKLL.  $[M+H]^+_{\text{found}} = 583.4797 \text{ m/z}$ ;  
 $[2M+H]^+_{\text{found}} = 1165.9465 \text{ m/z}$ ; fragment  $[M-NH_2]^+_{\text{found}} = 566.4518 \text{ m/z}$ .

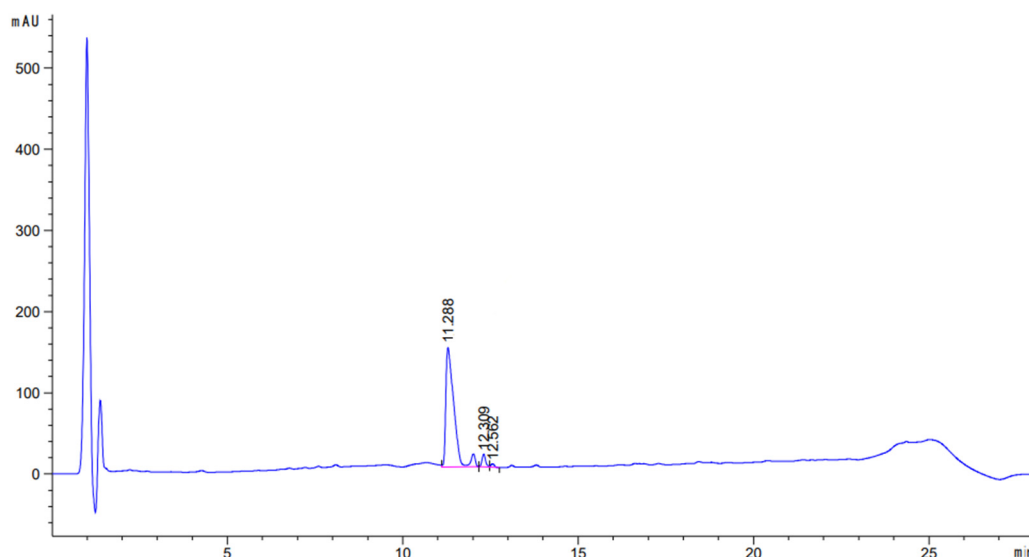

**Figure S7.** HPLC profile acquired for peptide **16** LUKL. Agilent Poroshell 120 4 $\mu$ m EC-C18-column. Gradient: 20-80 %B in 18 min – Flow: 1mL/min - Detection UV: 220 nm - Rt =11.288 min; Purity=94%

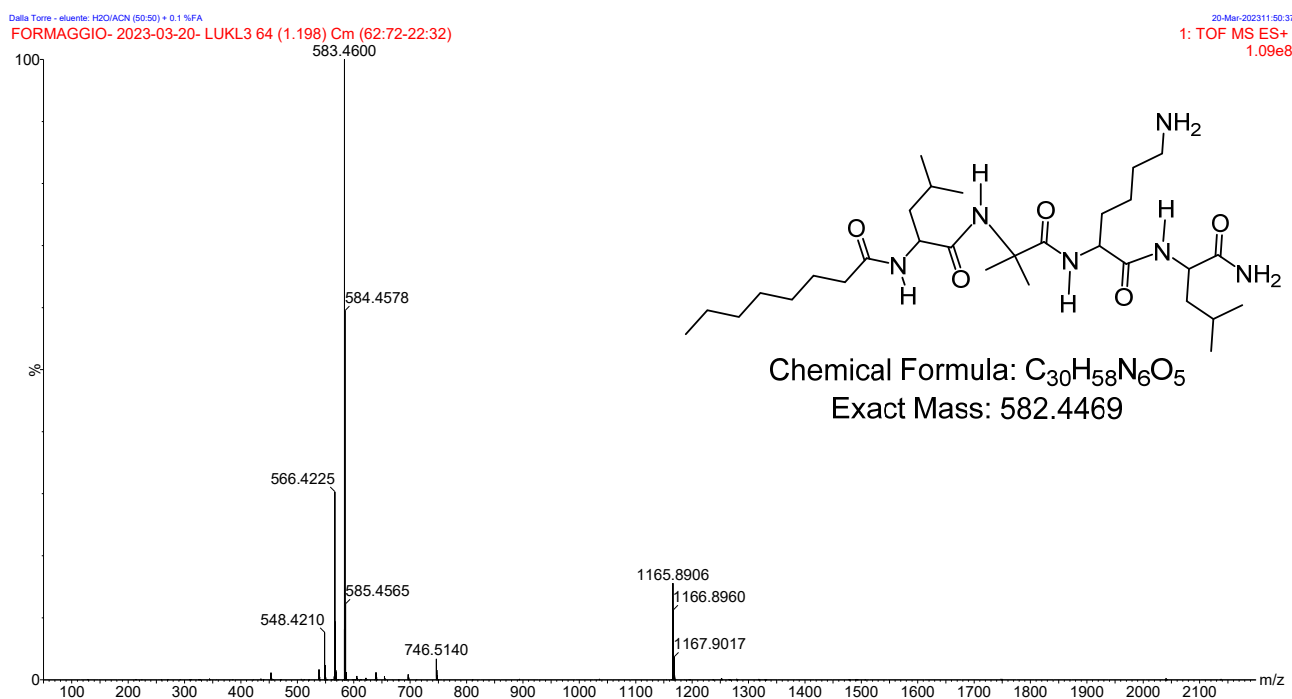

**Figure S8.** ESI-HRMS spectrum for peptide **16**.  $[M+H]^+_{\text{found}} = 583.4600$  m/z;  $[2M+H]^+_{\text{found}} = 1165.8906$  m/z; fragment  $[M-NH_2]^+_{\text{found}} = 566.4225$  m/z.

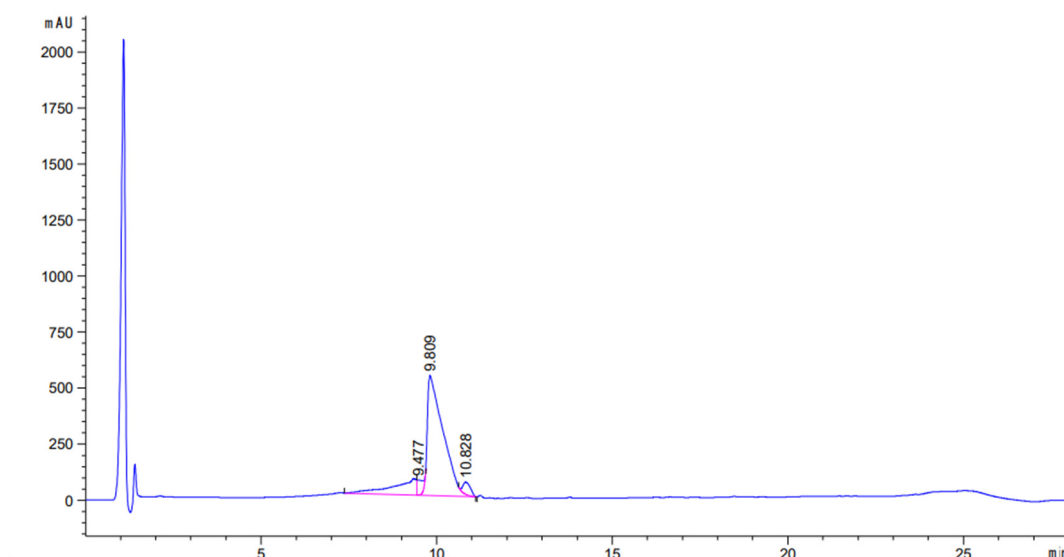

**Figure S9.** HPLC profile acquired for peptide **17** KLUL. Agilent Poroshell 120 4 $\mu$ m EC-C<sub>18</sub>-column. Gradient: 20-80 %B in 18 min – Flow: 1mL/min - Detection UV: 220 nm - Rt=9.809 min; Purity=92%

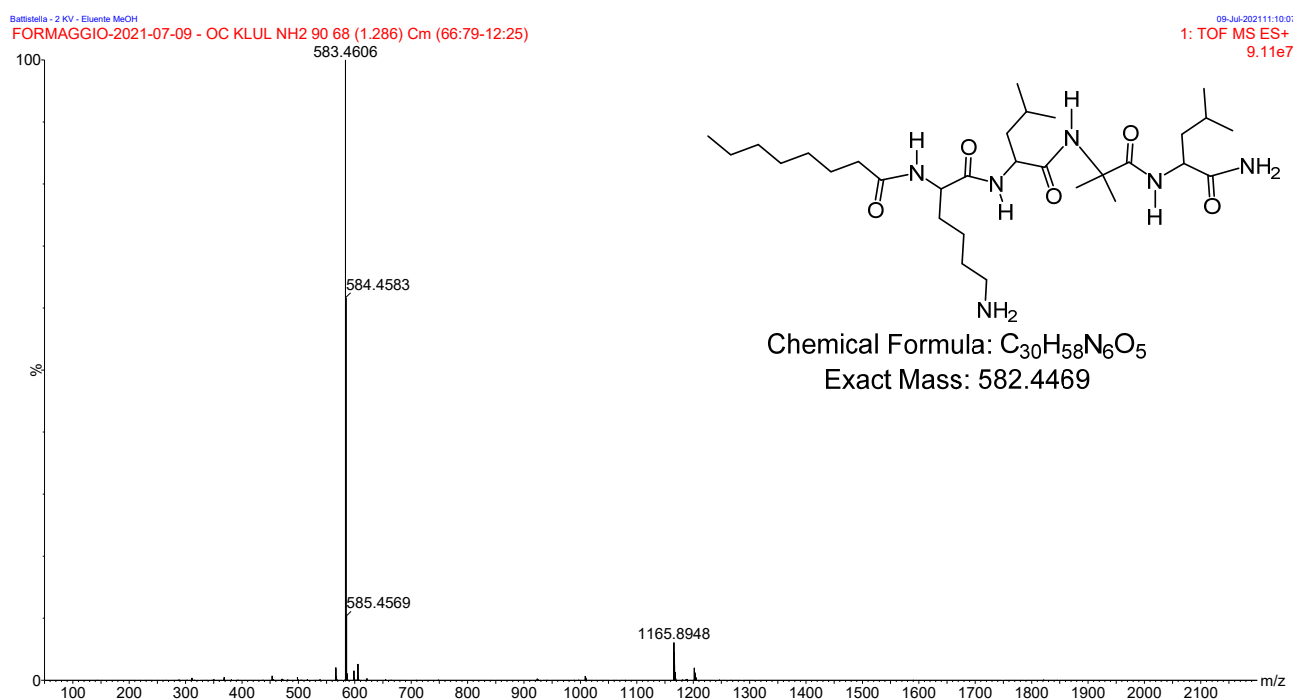

**Figure S10.** ESI-HRMS spectrum for peptide **17**.  $[M+H]^+_{\text{found}} = 583.4606 \text{ m/z}$ ;  $[2M+H]^+_{\text{found}} = 1165.8948 \text{ m/z}$ .

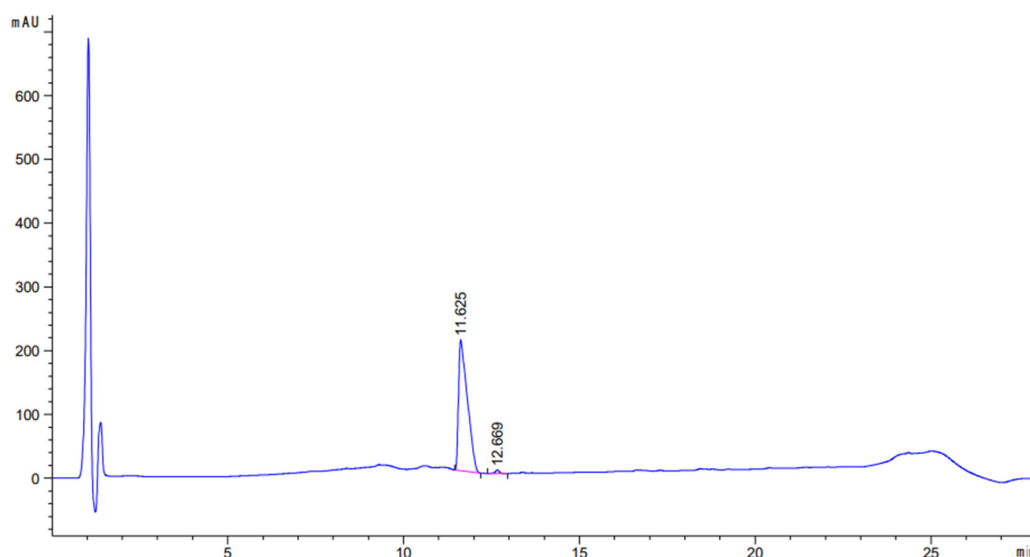

**Figure S11.** HPLC profile acquired for peptide **18** LKUL. Agilent Poroshell 120 4 $\mu$ m EC-C<sub>18</sub>-column. Gradient: 20-80 %B in 18 min – Flow: 1mL/min - Detection UV: 220 nm - Rt =11.625 min; Purity=98%

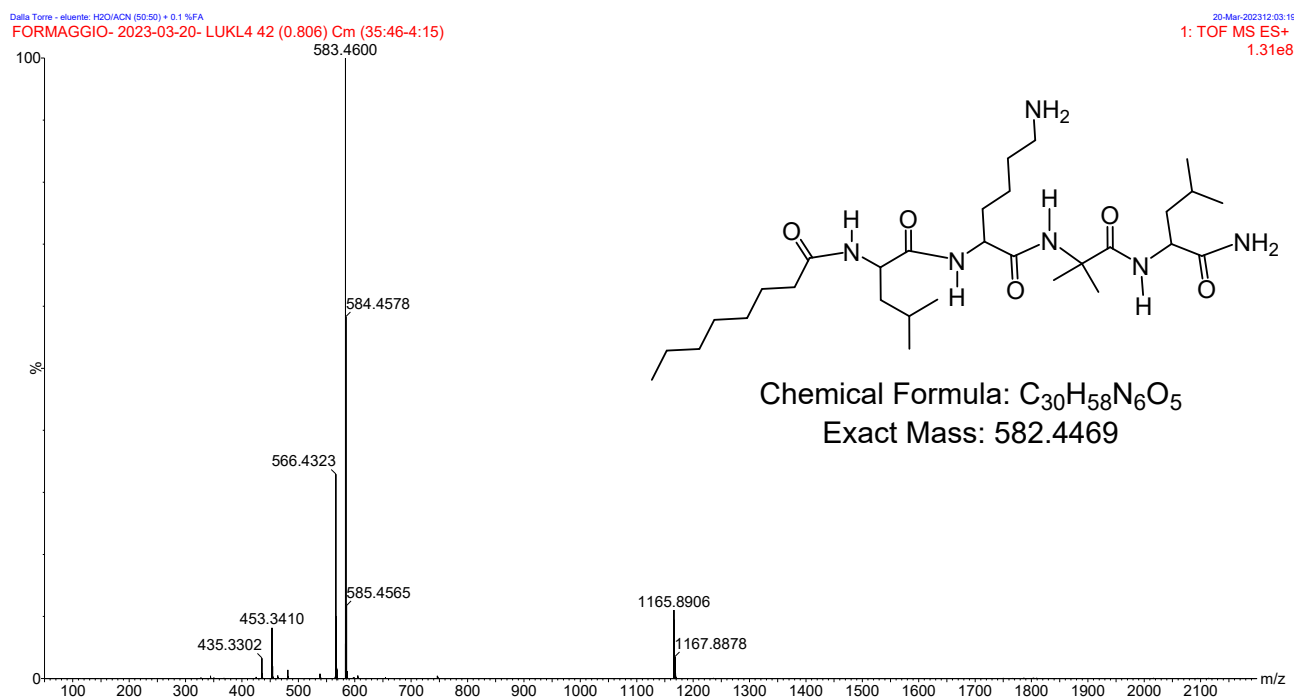

**Figure S12.** ESI-HRMS spectrum for peptide **18**.  $[M+H]^+$ <sub>found</sub> = 583.4600 m/z; fragment  $[M-NH_2]^+$ <sub>found</sub> = 566.4323 m/z; dimer  $[2M+H]^+$ <sub>found</sub> = 1165.8906 m/z.



**Table S1.** *In vitro* antibacterial activity (MIC and MBC) of compounds on reference strains.

| Peptide name                                           | MIC and MBC (µg/ml) <sup>a</sup> |             |             |             |                 |         |             |                 |
|--------------------------------------------------------|----------------------------------|-------------|-------------|-------------|-----------------|---------|-------------|-----------------|
|                                                        | Bsu                              | Efa         | Spy         | Sau         | Eco             | Kpn     | Aba         | Pae             |
| <b>0 Tric-Lol</b>                                      | 16/32                            | 16/32       | 16/16       | >128        | >128            | >128    | >128        | >128            |
| <b>1 [K<sup>2,5</sup>]-Lol</b>                         | <b>4/16</b>                      | <b>2/2</b>  | <b>2/4</b>  | 16          | 32/32           | >128    | <b>4/16</b> | 16              |
| <b>2 [K<sup>2</sup>]-NH<sub>2</sub></b>                | <b>4/16</b>                      | <b>4/8</b>  | <b>4/4</b>  | <b>8/8</b>  | >128            | 64/>128 | 16/16       | >128            |
| <b>3 [Leu<sup>4</sup>]-NH<sub>2</sub></b>              | >128                             | >128        | >128        | >128        | >128            | >128    | >128        | >128            |
| <b>4 [K<sup>5,6</sup>]-Lol</b>                         | <b>2/8</b>                       | <b>2/8</b>  | <b>2/2</b>  | 16/16       | 16/>16          | 16/32   | <b>2/2</b>  | <b>8/16</b>     |
| <b>4b [K<sup>5,6</sup>]-NH<sub>2</sub></b>             | <b>2/8</b>                       | <b>4/8</b>  | <b>2/8</b>  | 16/16       | 16/>16          | 32/>16  | <b>4/4</b>  | 16/>16          |
| <b>5 [K<sup>2,5,9</sup>]-Lol</b>                       | <b>8/16</b>                      | <b>4/8</b>  | <b>4/4</b>  | 16/16       | <b>8/&gt;16</b> | 16/16   | <b>4/16</b> | <b>8/&gt;16</b> |
| <b>5b [K<sup>2,5,9</sup>]-NH<sub>2</sub></b>           | <b>2/16</b>                      | <b>2/16</b> | <b>2/32</b> | <b>8/32</b> | 32/128          | 32/128  | <b>4/32</b> | 16/128          |
| <b>6 [K<sup>5</sup>,U<sup>6</sup>]-Lol</b>             | <b>8/16</b>                      | <b>8/8</b>  | <b>8/8</b>  | <b>8/16</b> | >128            | >128    | >128        | >128            |
| <b>6b [K<sup>5</sup>,U<sup>6</sup>]-NH<sub>2</sub></b> | 128/128                          | 128/128     | <b>8/32</b> | 128/128     | >128            | >128    | >128        | >128            |
| <b>7 [K<sup>2,5,6,9</sup>]-Lol</b>                     | <b>2/16</b>                      | <b>4/8</b>  | <b>2/8</b>  | 16/32       | 16/16           | 16/16   | <b>2/16</b> | <b>8/&gt;16</b> |
| <b>8 [Api<sup>8</sup>]-NH<sub>2</sub></b>              | 32/32                            | 16/16       | 16/16       | >128        | >128            | >128    | >128        | >128            |
| <b>9 [K<sup>9</sup>]-Lol</b>                           | <b>4/16</b>                      | <b>4/4</b>  | 16/32       | 16/16       | >128            | >128    | <b>8/8</b>  | >128            |
| <b>10 [K<sup>6</sup>]-Lol</b>                          | <b>4/16</b>                      | <b>4/16</b> | <b>4/16</b> | <b>8/16</b> | 64/128          | 16/64   | 16/>128     | <b>8/128</b>    |
| <b>10b [K<sup>6</sup>]-NH<sub>2</sub></b>              | <b>4/16</b>                      | <b>4/8</b>  | <b>4/16</b> | 32/32       | >128            | >128    | 16/16       | >128            |
| <b>11 [K<sup>2,5,6</sup>]-NH<sub>2</sub></b>           | <b>2/16</b>                      | <b>4/32</b> | <b>4/16</b> | 16          | 16/128          | >128    | <b>2/2</b>  | >128            |
| <b>12 [4-11]</b>                                       | 4/16                             | 32/32       | 16/16       | 16/16       | 16/64           | 64/>128 | 32/32       | 64/>128         |
| <b>13 UKKLL</b>                                        | 32/64                            | >128        | >128        | >128        | >128            | >128    | >128        | >128            |
| <b>14 LUKI</b>                                         | >128                             | >128        | >128        | >128        | >128            | >128    | >128        | >128            |
| <b>15 UKLL</b>                                         | 16/32                            | 32/32       | 16/16       | 64/>128     | 64/>128         | 64/>128 | 64/128      | 64/>128         |
| <b>16 LUKL</b>                                         | >128                             | >128        | >128        | >128        | >128            | >128    | >128        | >128            |
| <b>17 KLUL</b>                                         | >128                             | >128        | >128        | >128        | >128            | >128    | >128        | >128            |
| <b>18 LKUL</b>                                         | 128/>128                         | >128        | 128         | >128        | >128            | >128    | >128        | >128            |

<sup>a</sup>Gram positive: *Bacillus subtilis* ATCC 6633 (Bsu), *Enterococcus faecalis* ATCC 29212 (Efa), *Streptococcus pyogenes* ATCC 12344 (Spy), *Staphylococcus aureus* ATCC 25923 (Sau); Gram negative: *Escherichia coli* CCUGT (Eco), *Klebsiella pneumoniae* ATCC 13833 (Kpn), *Acinetobacter baumannii* ATCC 17978 (Aba), *Pseudomonas aeruginosa* ATCC 27853 (Pae).

**Table S2.** *In vitro* antibacterial activity (MIC) of trichogin GA IV and its analogs against clinical isolates of *S.aureus*, *A. baumannii*, and *P. aeruginosa*.

| Peptide No.                                   | MIC/MBC (µg/ml) <sup>a</sup>      |                                    |                                                          |                                     |                                        |                                        |                                       |                                     |
|-----------------------------------------------|-----------------------------------|------------------------------------|----------------------------------------------------------|-------------------------------------|----------------------------------------|----------------------------------------|---------------------------------------|-------------------------------------|
|                                               | <i>S.aureus</i> ATCC 43300 (MRSA) | <i>A. baumannii</i> SI-12 (OXA-23) | <i>A. baumannii</i> SI-648 (OXA-23, OXA-51-like (ISAba)) | <i>A. baumannii</i> SI-310 (OXA-24) | <i>P. aeruginosa</i> VR-143/97 (VIM-1) | <i>P. aeruginosa</i> VA-182/00 (VIM-2) | <i>P. aeruginosa</i> 101/1477 (IMP-1) | <i>P. aeruginosa</i> 506/99 (IMP-2) |
| <b>1 [K<sup>2,5</sup>]-Lol</b>                | 2/2                               | 4/8                                | 8/16                                                     | 4/4                                 | 32/32                                  | 16/16                                  | 8/16                                  | 16/32                               |
| <b>2 [K<sup>2</sup>]-NH<sub>2</sub>*</b>      | 2/4                               | 32/32                              | 16/32                                                    | 32/32                               | >128                                   | >128                                   | >128                                  | >128                                |
| <b>4 [K<sup>5,6</sup>]-Lol</b>                | 4/8                               | 2/4                                | 4/4                                                      | 4/8                                 | 16/32                                  | 16/32                                  | 8/16                                  | 16/16                               |
| <b>4b [K<sup>5,6</sup>]-NH<sub>2</sub></b>    | 8/8                               | 4/4                                | 4/4                                                      | 4/8                                 | 32/64                                  | 32/64                                  | 32/64                                 | 32/32                               |
| <b>5 [K<sup>2,5,9</sup>]-Lol</b>              | 2/2                               | 4/4                                | 4/4                                                      | 2/4                                 | 8/8                                    | 8/8                                    | 8/8                                   | 8/8                                 |
| <b>5b [K<sup>2,5,9</sup>]-NH<sub>2</sub></b>  | 2/2                               | 4/8                                | 4/4                                                      | 2/4                                 | 16/32                                  | 8/32                                   | 8/8                                   | 8/32                                |
| <b>6 [K<sup>5</sup>,U<sup>6</sup>]-Lol</b>    | 4/8                               | -                                  | -                                                        | -                                   | -                                      | -                                      | -                                     | -                                   |
| <b>7 [K<sup>2,5,6,9</sup>]-Lol</b>            | 4/8                               | 2/4                                | 2/4                                                      | 4/4                                 | 8/8                                    | 8/8                                    | 8/8                                   | 8/8                                 |
| <b>9 [K<sup>9</sup>]-Lol</b>                  | 4/8                               | 32/32                              | 32/32                                                    | 32/32                               | >128                                   | >128                                   | >128                                  | >128                                |
| <b>10 [K<sup>6</sup>]-Lol</b>                 | 4/8                               | 32/32                              | 16/16                                                    | 16/16                               | >128                                   | >128                                   | >128                                  | >128                                |
| <b>11 [K<sup>2,5,6</sup>]-NH<sub>2</sub>*</b> | 2/2                               | 32/32                              | 2/4                                                      | 2/4                                 | 8/8                                    | 8/32                                   | 8/8                                   | 8/16                                |

<sup>a</sup> MIC between 2 and 8 µg/mL are highlighted with a green background. -, not determined.

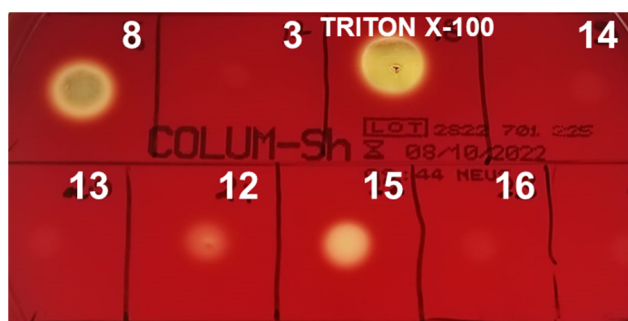

**Figure S13.** Implementation of the hemolysis test as described in Bechlars *et al.* [58]. After spotting 2  $\mu$ L (50  $\mu$ g) of each compound at a random location on the blood agar plate and incubation at  $35 \pm 2$   $^{\circ}$ C for 24 h, the plates were manually inspected for the presence of hemolysis zones. Triton X-100 and DMSO were used as the positive and negative controls, respectively. Results were interpreted as follows: compounds 3, 13, 14 and 16, no hemolysis detected; compound 12, limited hemolysis (indicated as -\* in Table 2); compounds 8 and 15, hemolytic activity (the average value of the diameters of the hemolysis zone measured in individual experiments is reported in Table 2).
